# Supplementary material for: Transparent and visible-light harvesting acridone-bridged mesostructured organosilica film
Source: Royal Society of Chemistry journal article supplement (doi:10.1039/c0jm00275e), 2010-01-01
Supplement: c0jm00275e.pdf [file c0jm00275e.pdf]

Electronic Supplementary Information

## Transparent and visible-light harvesting acridone-bridged mesostructured organosilica film

Yoshifumi Maegawa,<sup>a,b</sup> Norihiro Mizoshita,<sup>a,b</sup> Takao Tani<sup>a,b</sup> and Shinji Inagaki<sup>\*a,b</sup>

<sup>a</sup> Toyota Central R&D Laboratories, Inc., Nagakute, Aichi 480-1192, Japan.

<sup>b</sup> Core Research for Evolutional Science and Technology (CREST), Japan Science and Technology Agency (JST), Kawaguchi, Saitama 332-0012, Japan

### 1. Synthesis of precursor 2

The precursor **2** was synthesized according to the synthetic route shown in Scheme S1. Fig. S1 and S2 show the NMR spectra of the precursor **2**.

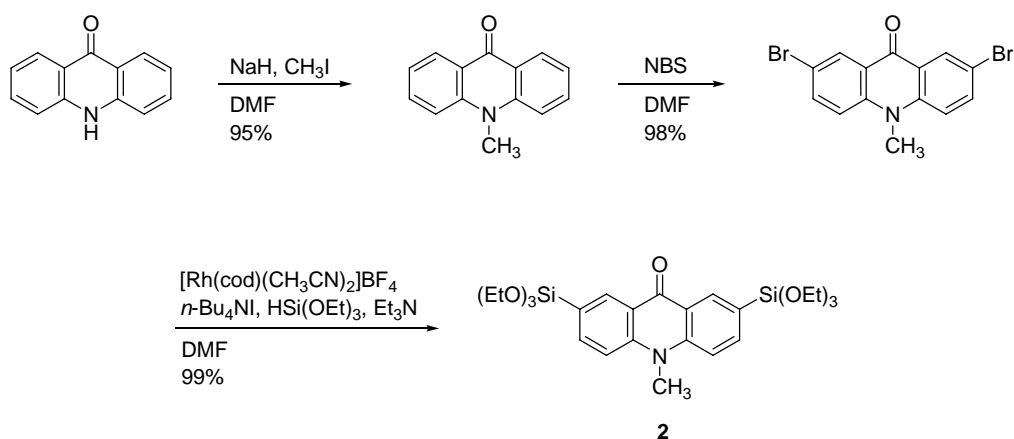

**Scheme S1.** Synthetic route of the precursor **2**.

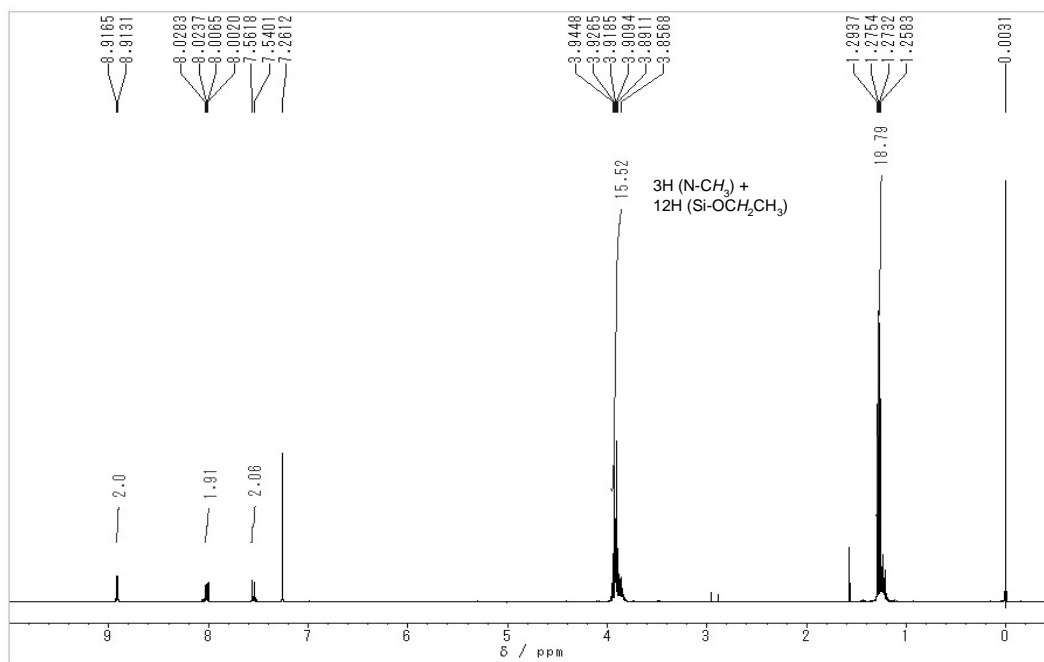

**Fig. S1**  $^1\text{H}$  NMR spectrum of the precursor **2** in  $\text{CDCl}_3$ .

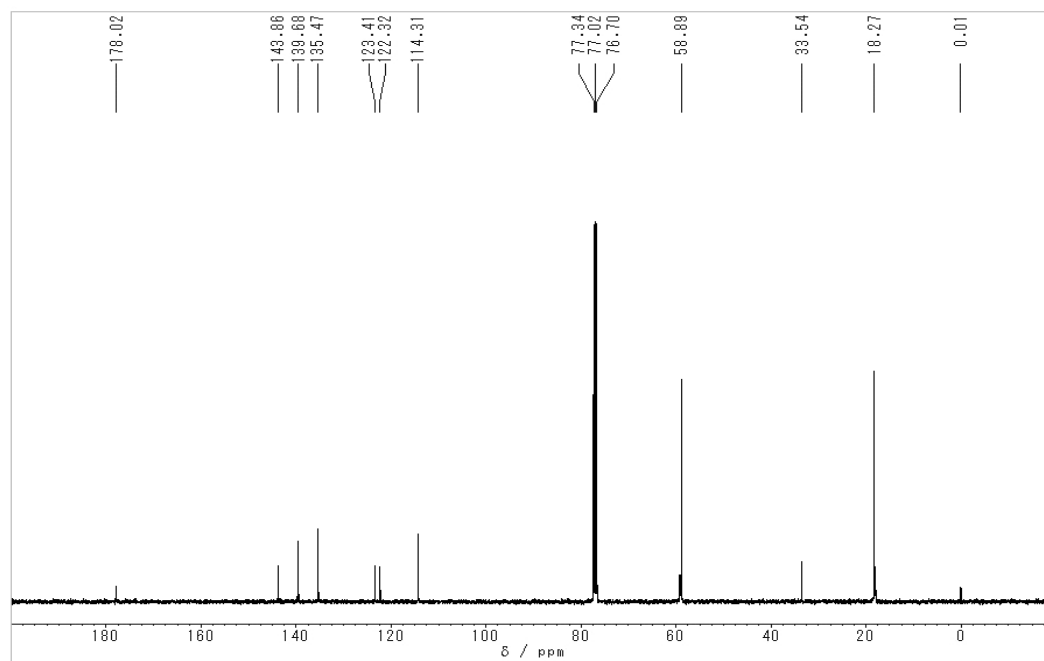

**Fig. S2**  $^{13}\text{C}$  NMR spectrum of the precursor **2** in  $\text{CDCl}_3$ .

## **2. Infrared absorption spectrum of the precursor 1**

An infrared absorption (IR) measurement was carried out to evaluate the bonding state of the N-H and C=O units in the precursor **1**. The IR band due to the stretching mode of hydrogen-bonded N-H and C=O units is clearly indicated at  $3260\text{ cm}^{-1}$  and  $1621\text{ cm}^{-1}$ , respectively.

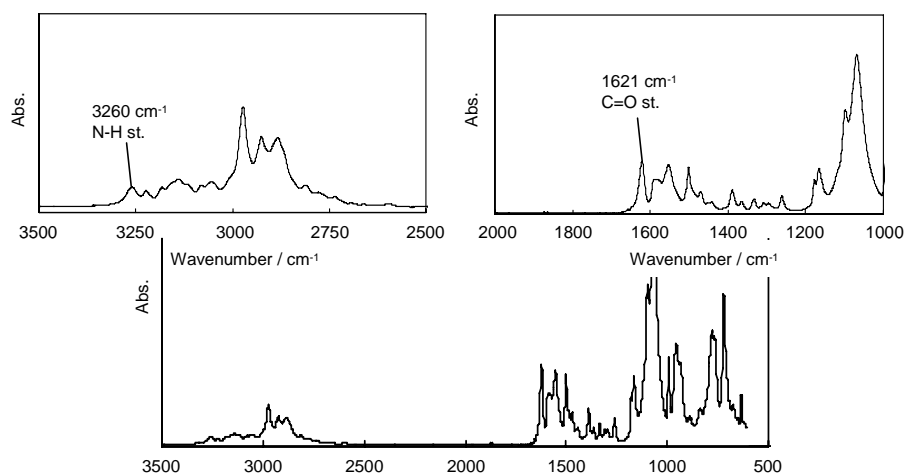

**Fig. S3** Infrared absorption spectrum of the precursor **1** and details of the spectrum at  $2500\text{--}3500\text{ cm}^{-1}$  and  $1000\text{--}2000\text{ cm}^{-1}$

## **4. UV-vis absorption spectra of sol solution 1 before and after filtration**

The amount of **1** dissolved in the sol solution before and after filtration was examined by UV-vis absorption. The measurement was carried out for the sol solution after thousand-fold dilution with 2-propanol. The absorbance at 398 nm due to **1** decreased by <7% by filtration, which indicates that >93% of **1** was still remained in the sol solution after filtration.

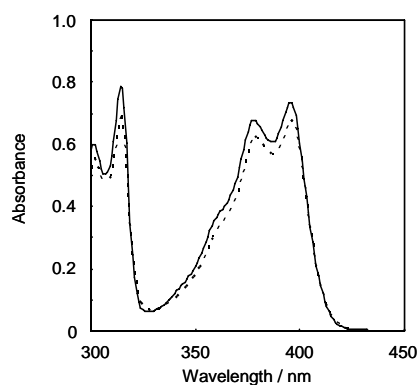

**Fig. S4** UV-vis absorption spectra of the sol solution of **1** before (solid lines) and after (broken lines) filtration.

### **5. Optical micrograph of F-2 after extraction of the surfactant**

An optical microscopy observation was carried out for **F-2** after extraction of the surfactant (Fig. S5). **F-2** mostly retained its transparency without cracking even after the extraction, although the surface became slightly rough due to shrinkage by further condensation with exposure to  $\text{NH}_3$  vapor prior to the extraction.

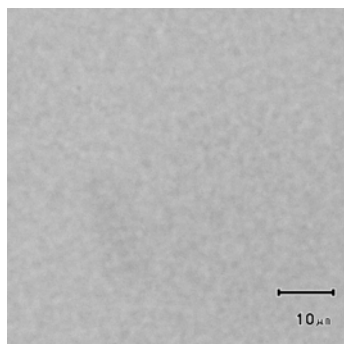

**Fig. S5** Optical micrograph of **F-2** after extraction of the surfactant (scale bar represents 10  $\mu\text{m}$ ).

### **6. Confirmation of removal of P123**

In order to remove template surfactant P123 from **F-2**, the film was washed with ethanol. The removal of P123 was confirmed by IR measurements (Fig. S6). Disappearance of the IR bands at  $2850\text{--}2960\text{ cm}^{-1}$  corresponding to the C–H stretching modes of the alkyl chain of P123 confirms complete removal of P123 by the ethanol wash, while the band at  $1639\text{ cm}^{-1}$  due to the carbonyl C=O stretching mode of the organic bridge is unchanged before and after extraction of P123.

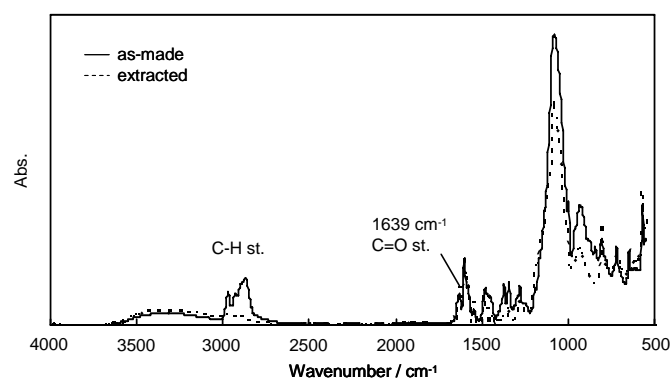

**Fig. S6** Infrared absorption spectra of **F-2** before (solid line) and after (broken line) ethanol wash.

### 7. UV-vis absorption and fluorescence emission spectra of F-1 and aggregates of the precursor 1

Fig. S7 shows UV-vis absorption (a) and fluorescence emission spectra (b) of **F-1** and aggregates of the precursor **1** prepared by spin-coating of its ethanol solution. The UV-vis absorption and fluorescence emission spectra of **F-1** were primarily similar to that of the aggregates of the precursor **1**. This suggests that the conformation of most of the acridone groups in **F-1** is similar to that of the aggregates of the precursor **1**.

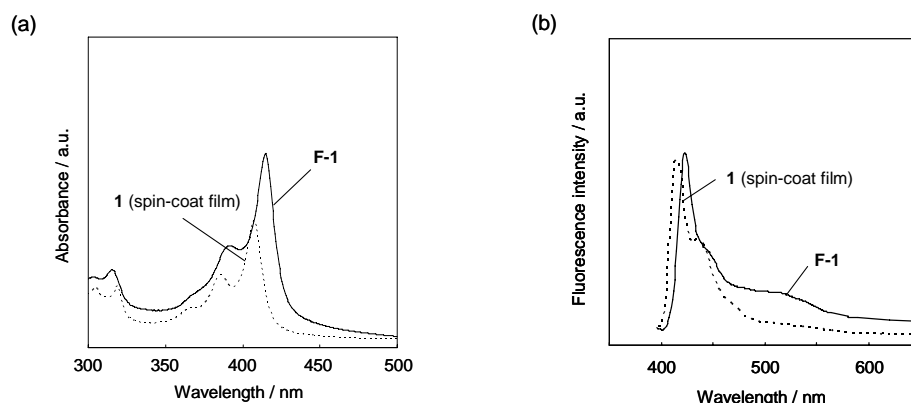

**Fig. S7** (a) UV-vis absorption and (b) fluorescence emission spectra of **F-1** (solid lines) and aggregates of the precursor **1** (broken lines). The excitation wavelength is 380 nm for all samples.

### 8. Excitation spectra of F-1 and F-2

Fig. S8 shows excitation spectra of **F-1** and **F-2** at various wavelengths. The excitation spectrum of **F-1** at 450 nm was different from that at 520 nm. This result indicates that the fluorescence emission is originated from at least two components. The excitation spectrum of **F-1** at 450 nm showed a sharp peak attributable to the aggregates at 416 nm, whereas the excitation spectrum of **F-1** at 520 nm was similar to that of **F-2** at 500 nm. On the other hand, the excitation spectrum of **F-2** at 500 nm was primarily identical to its UV-vis absorption spectrum, which indicates that the fluorescence emission is originated from one component.

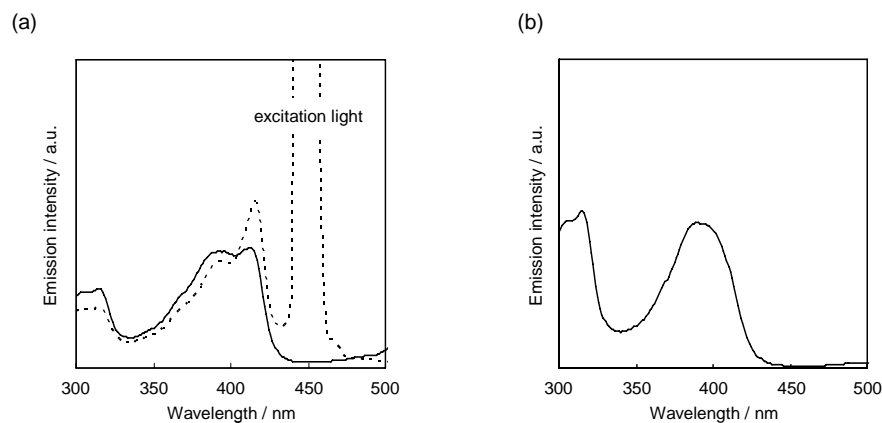

**Fig. S8** (a) Excitation spectra of **F-1** at 450 nm (broken line) and at 520 nm (solid line) and (b) **F-2** at 500 nm.

### **9. Fluorescence quantum yields of F-2 before and after extraction of the surfactant**

Fluorescence quantum yields of **F-2** were compared before and after extraction of the surfactant (Fig. S9). The extraction significantly decreased the fluorescence quantum yield of **F-2** possibly due to quenching by oxygen diffused into the mesochannels.

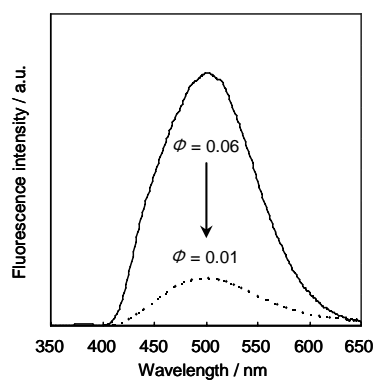

**Fig. S9** Fluorescence emission spectra and quantum yields ( $\phi$ ) of **F-2** before (solid lines) and after (broken lines) extraction of the surfactant.
